# Supplementary material for: pH-Modulated luminescence switching in a Eu-MOF: rapid detection of acidic amino acids
Source: Royal Society of Chemistry journal article supplement (doi:10.1039/c9ta00384c), 2019-01-01
Supplement: c9ta00384c1.pdf [file c9ta00384c1.pdf]

Electronic Supplementary Material (ESI) for

This journal is © The Royal Society of Chemistry 2019

**pH-modulated luminescence switching in a Eu-MOF: rapid  
detection of acidic amino acids**

Yifang Zhao, Meng-Yan Wan, Jian-Ping Bai, Heng Zeng, Weigang Lu, Dan Li\*

*College of Chemistry and Materials Science, Jinan University, Guangzhou 510632, P. R. China*

*E-mail: danli@jnu.edu.cn*

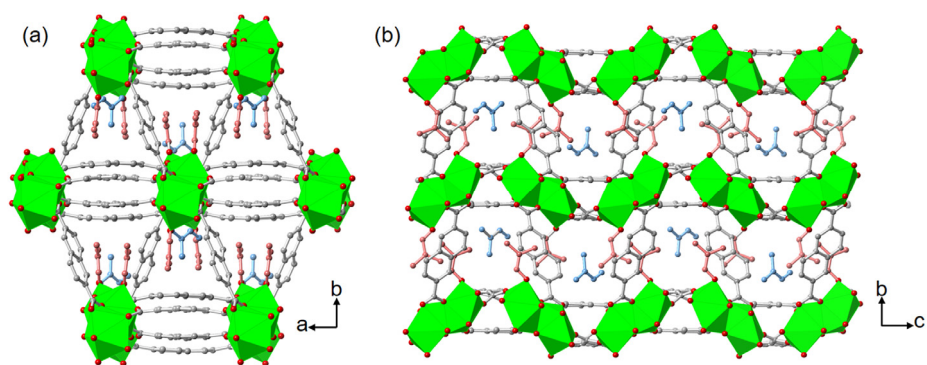

Fig. S1 3D structures of Eu-MOF (**1**) along *c* axis (a) and *a* axis (b) of the as-synthesized framework. The red balls represent the coordinated DMF molecules and the blue ones are the non-coordinated DMF molecules.

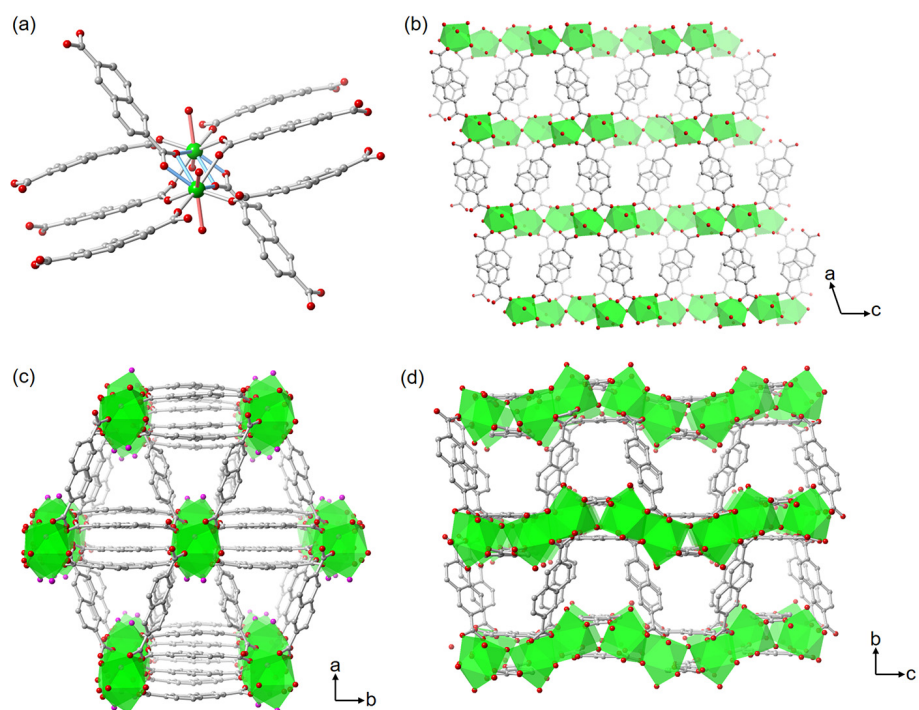

Fig. S2 (a) Coordination environments of a pair of Eu ions; (b) a packed 2D layers along *b* axis; and perspective view of the channels along *c* axis (c) and *a* axis (d) of **2** after the detection experiment. The hydrogen atoms are omitted for clarity. The red balls represent the bridging and terminal water molecules.

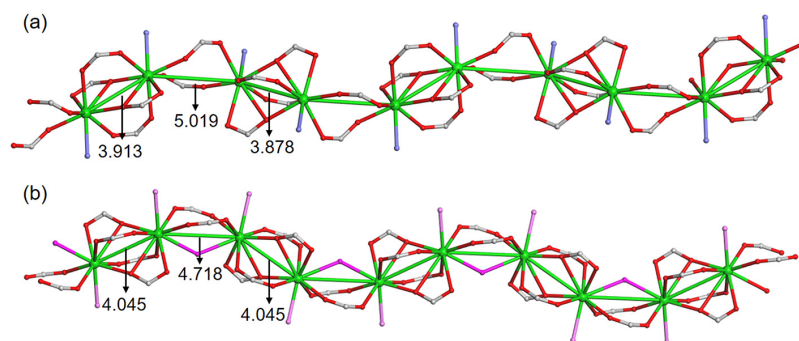

Fig. S3 The Eu chains along  $c$  axis before (a) and after (b) detection experiment. The numbers represent the distances between Eu ions in Å.

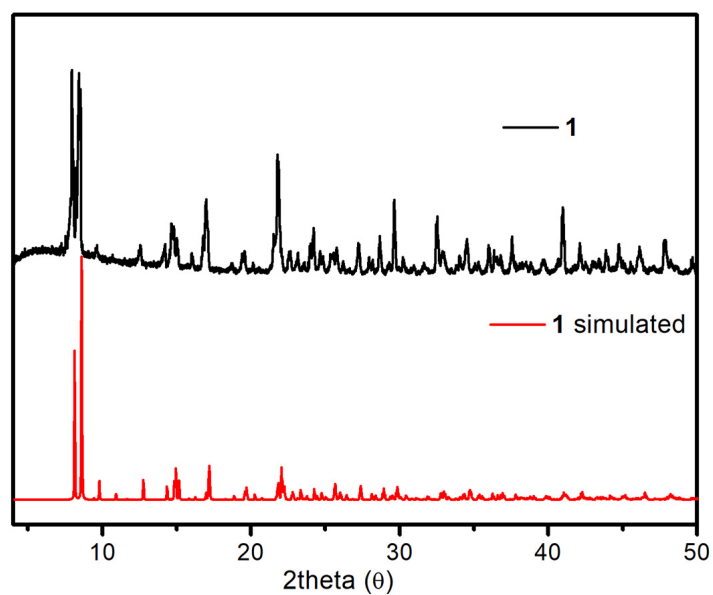

Fig. S4 Simulated and experimental powder X-ray diffraction patterns (PXRD) of the as-synthesized **1**.

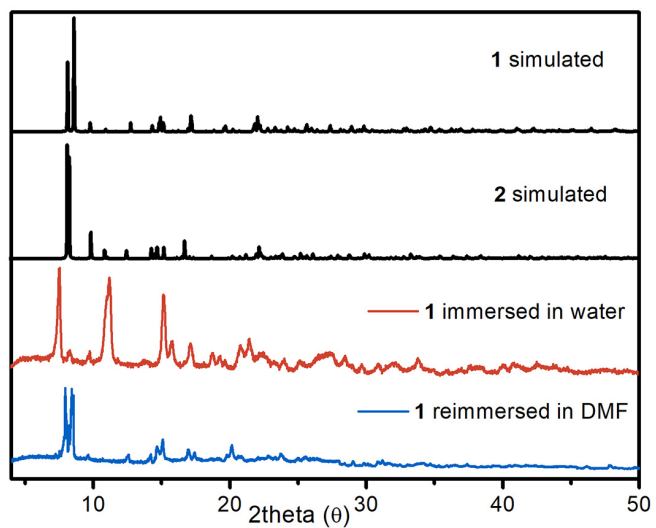

Fig. S5 PXR D patterns of the simulated patterns of **1** and **2**, **1** immersed in water, and **1** reimmersed in DMF solvents.

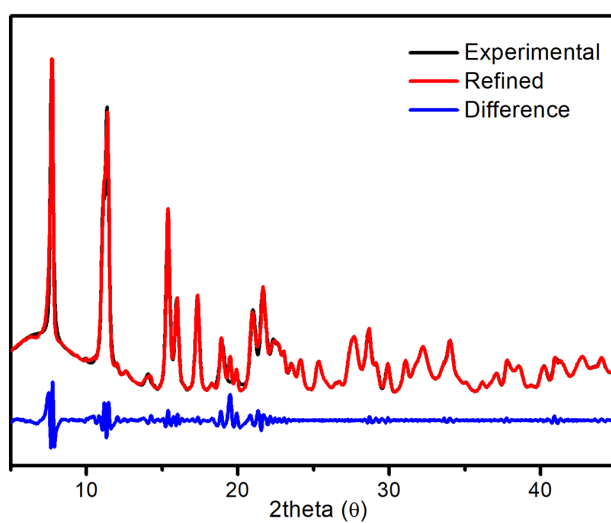

Fig. S6 Pawley refinement of PXR D patterns of **1** immersed in water. Experimental (black line), refined (red line) and the difference (below) patterns of **1** immersed in water.

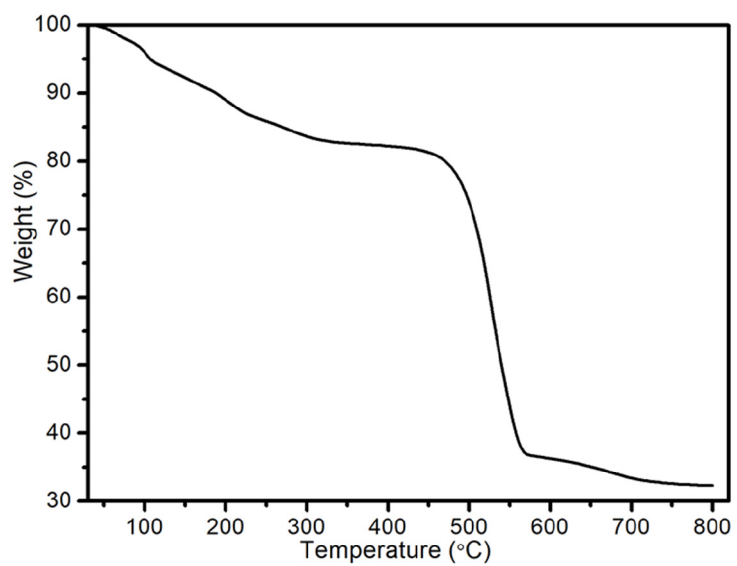

Fig. S7 The TG curve of **1** in a N<sub>2</sub> flow from 40 °C to 800 °C.

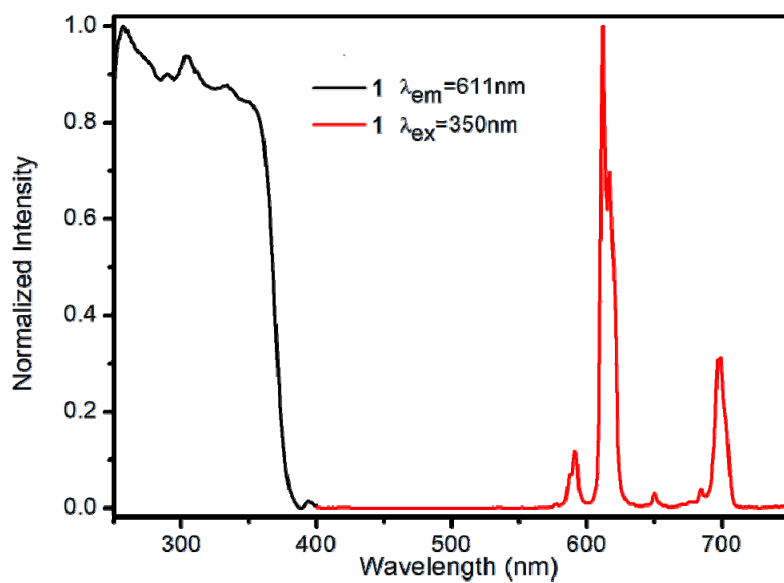

Fig. S8 The excitation (black line) and emission spectra (red line) of **1** in the solid state.

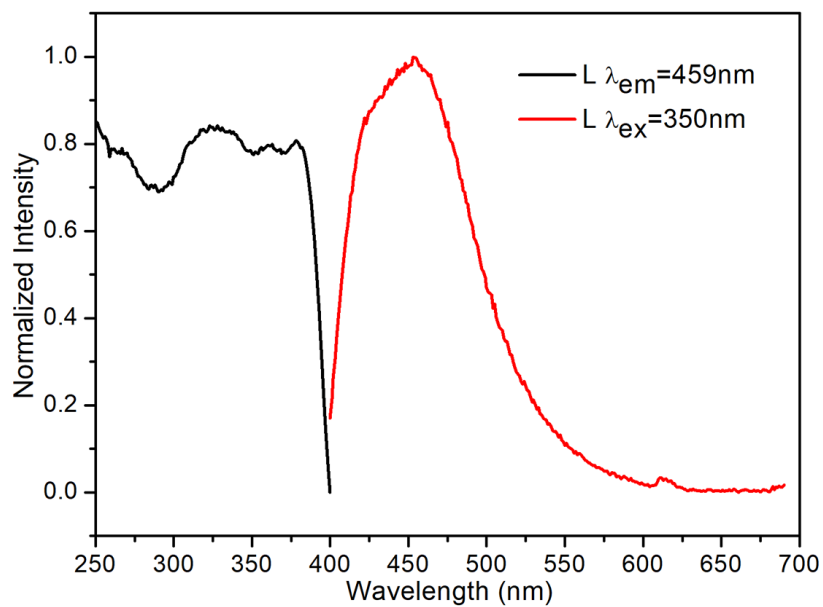

Fig. S9 The excitation (black line) and emission spectra (red line) of ligands H<sub>2</sub>NDC in the solid state.

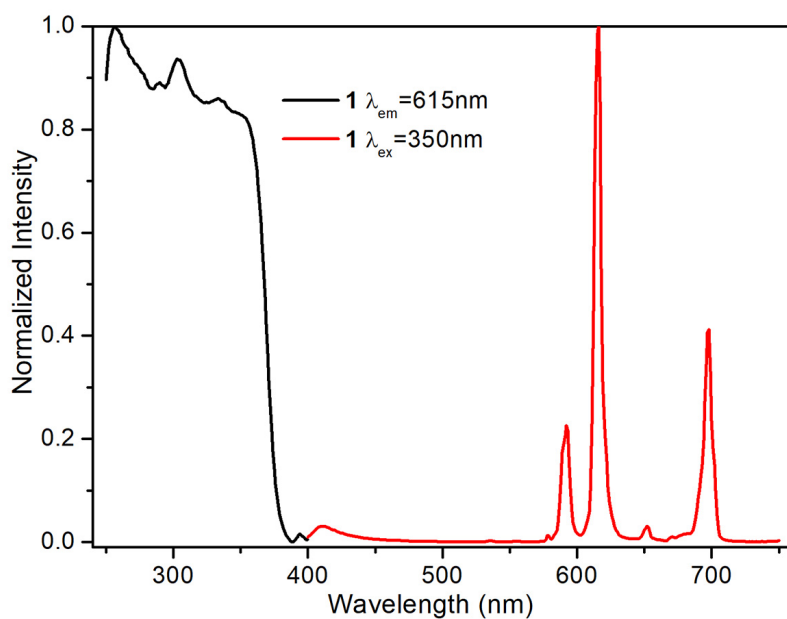

Fig. S10 The excitation (black line) and emission spectra (red line) of **1** dispersed in water (pH 7).

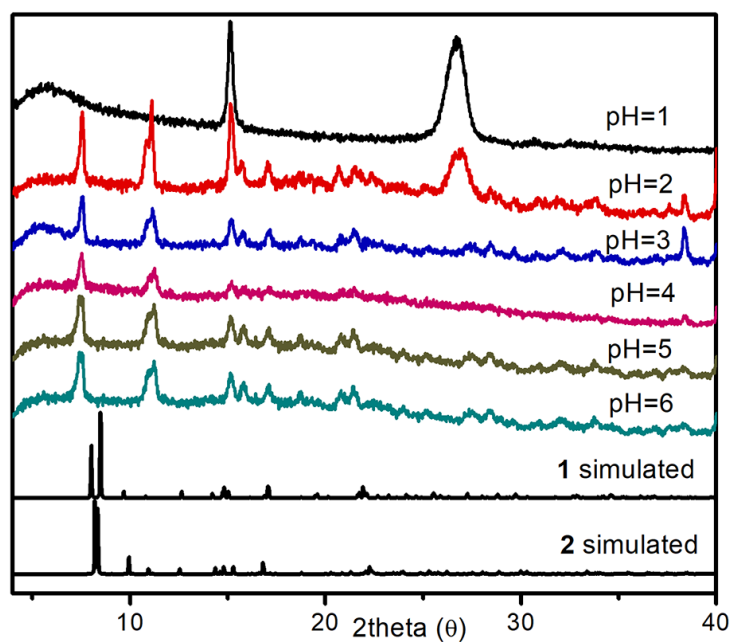

Fig. S11 PXRD patterns of **1** after treated with HCl solutions at different pH (1 to 6) for 24 hrs and the simulated patterns of **1** and **2**.

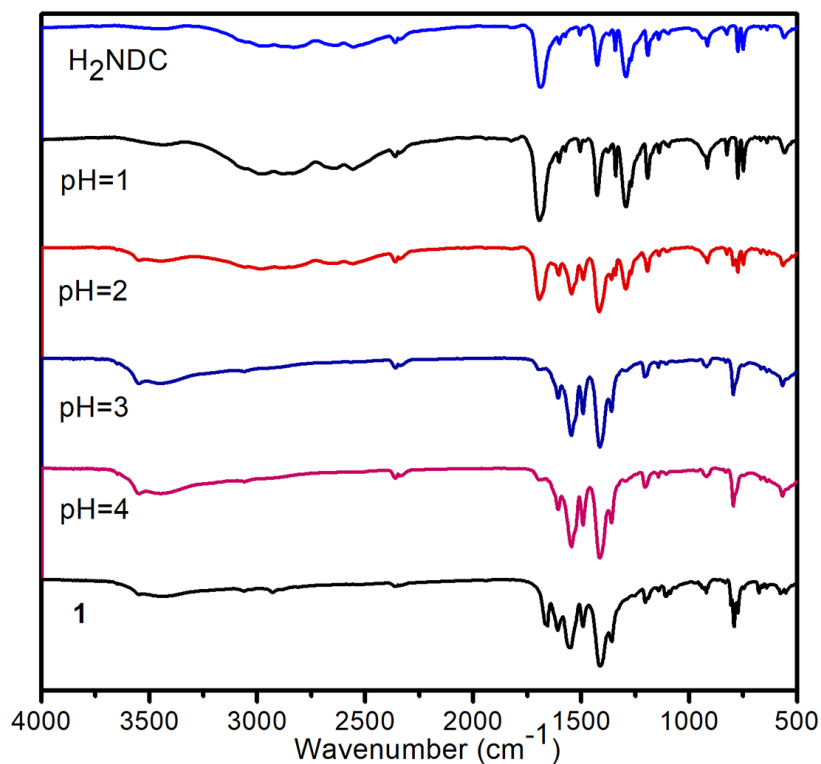

Fig. S12 IR spectra of **1**, the HCl-treated **1** (immersed in HCl solutions with pH from 1 to 4) and the ligand.

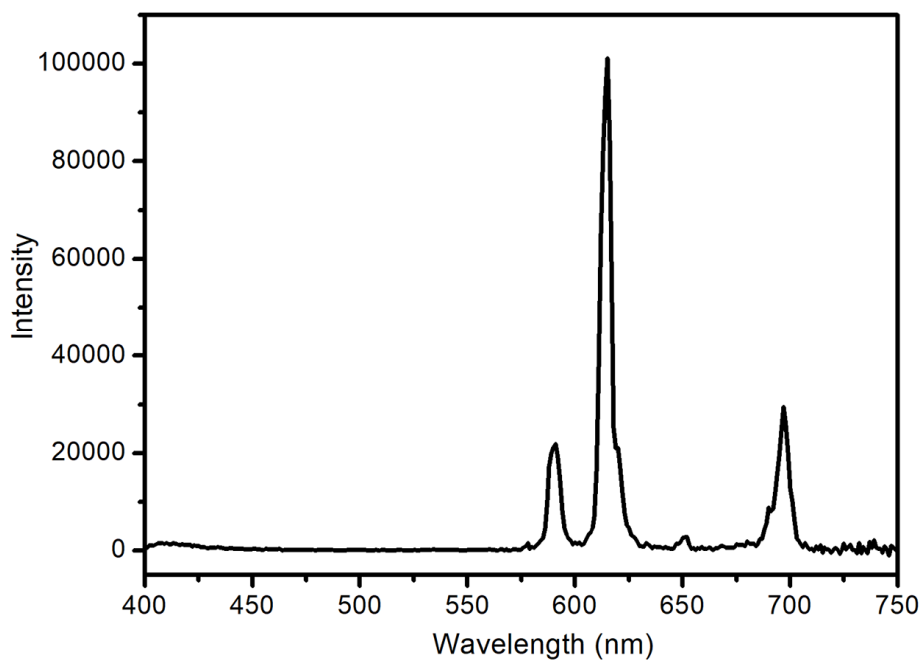

Fig. S13 Emission spectra of **1** after immersed in water for half a year.

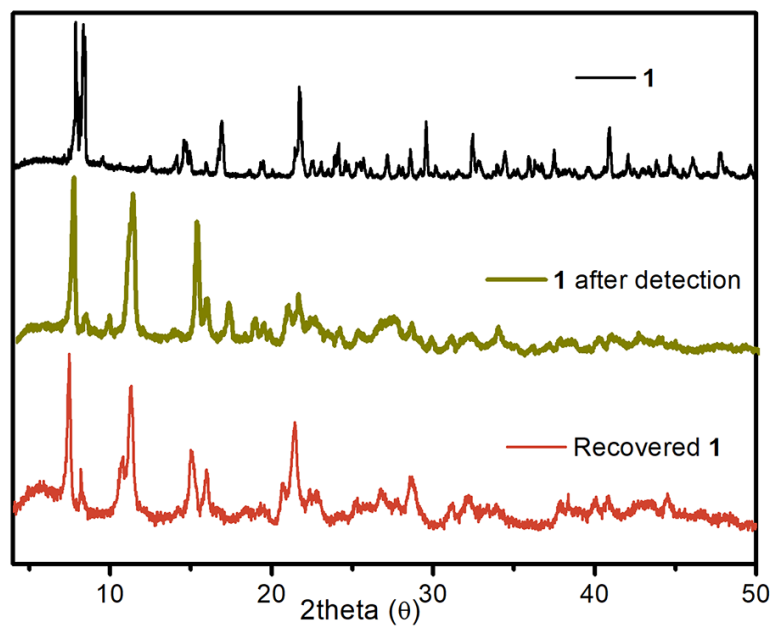

Fig. S14 PXRD patterns of as-synthesized **1**, **1** after detection experiment, and **1** immersed in ethanol.



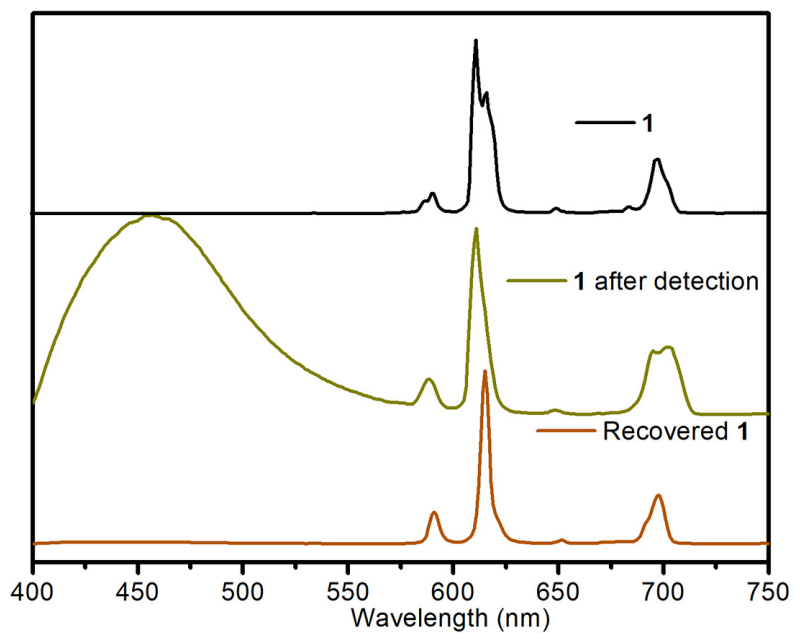

Fig. S15 Solid state emission spectra of **1**, **1** after detection experiment, and recovered **1** (immersed into ethanol and filtered).

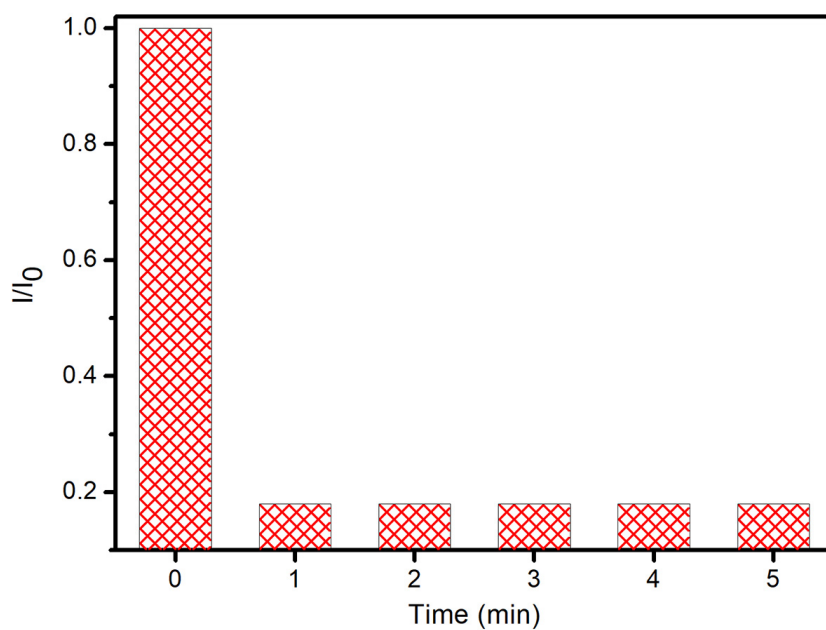

Fig. S16 Quenching efficiency of emission at 615 nm for **1** as a function of time when immersed in HCl solution (pH = 3.2).

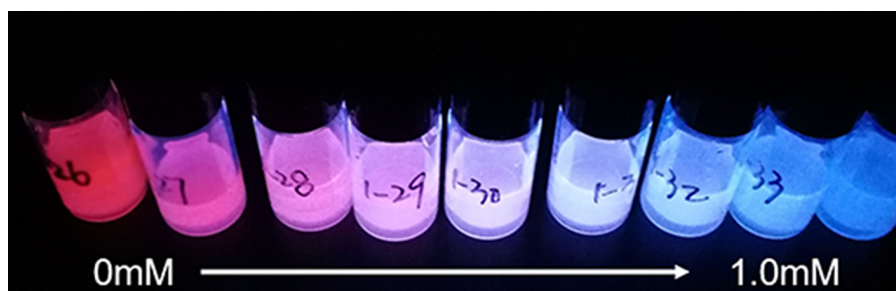

Fig. S17 The photographs of **1** in aqueous Asp solutions with different concentrations under the irradiation of 365 nm UV light.

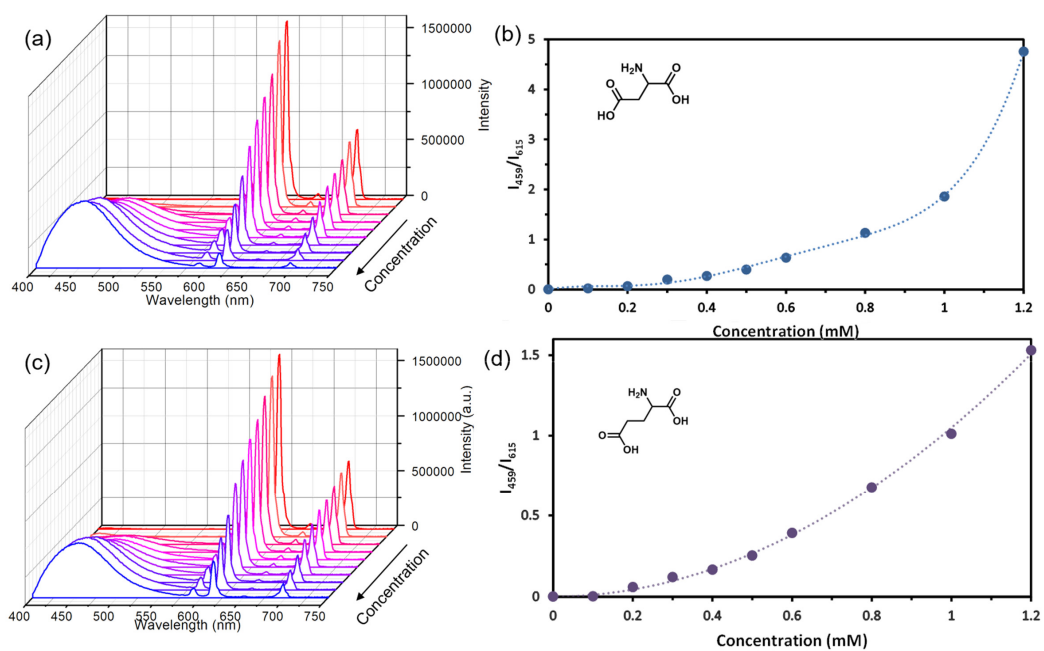

Fig. S18 The emission spectra of **1** in aqueous Asp solutions at different concentrations (a, b) and Glu (c, d) and the corresponding plots of the relative intensity  $I_{459}/I_{615}$  and the concentration.

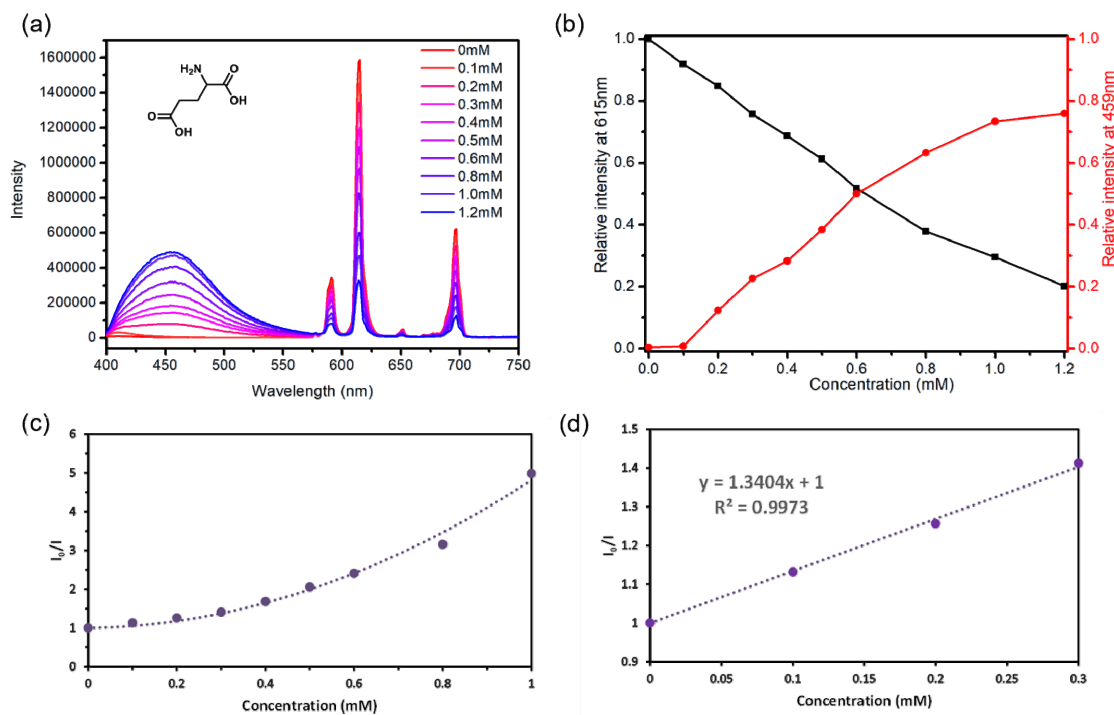

Fig. S19 Emission spectra of **1** in aqueous solutions of Glu at different concentrations; (b) the corresponding plot of the relative intensity at 615 nm and 459 nm as a function of concentrations. The relative intensity at 615 nm is calculated by  $I/I_0$  ( $I_0$  is the peak intensity at 615 nm of the as-synthesized sample). The relative intensity at 459 nm is calculated by  $I/I_{3.00}$  ( $I_{3.00}$  is the peak intensity at 459 nm of the HCl-treated samples at pH 3.00). (c) S-V plot of **1** in Glu and (d) the corresponding linear fitting at low concentrations.

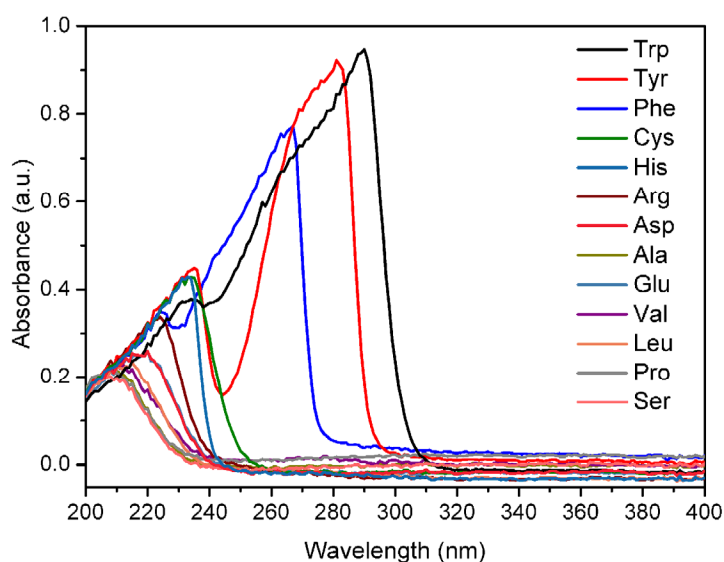

Fig. S20 UV-vis absorption spectra of various amino acids.

Table S1. Crystal data and structure refinement parameters for **1** and **2**.

| Compound                                         | Eu-MOF (1)                                                   | Eu-MOF-H <sub>2</sub> O (2)                                                   |
|--------------------------------------------------|--------------------------------------------------------------|-------------------------------------------------------------------------------|
| Empirical fomula                                 | [Eu <sub>2</sub> (NDC) <sub>3</sub> (DMF) <sub>2</sub> ]-DMF | [Eu(H <sub>2</sub> O) <sub>0.5</sub> (NDC) <sub>1.5</sub> (H <sub>2</sub> O)] |
| <i>M<sub>r</sub></i>                             | 1165.73                                                      | 998.45                                                                        |
| Temperature(K)                                   | 149.99(10)                                                   | 150.01(10)                                                                    |
| Crystal size(mm)                                 | 0.08×0.06×0.02                                               | 0.08×0.05×0.02                                                                |
| Crystal system                                   | Monoclinic                                                   | Monoclinic                                                                    |
| Space group                                      | <i>P</i> 2 <sub>1</sub> / <i>n</i>                           | <i>C</i> 2/ <i>c</i>                                                          |
| <i>a</i> /Å                                      | 11.93700(10)                                                 | 12.4096(5)                                                                    |
| <i>b</i> /Å                                      | 21.89300(10)                                                 | 21.3850(8)                                                                    |
| <i>c</i> /Å                                      | 16.57120(10)                                                 | 16.2060(6)                                                                    |
| <i>α</i> /°                                      | 90                                                           | 90                                                                            |
| <i>β</i> /°                                      | 100.5340(10)                                                 | 103.343(4)                                                                    |
| <i>γ</i> /°                                      | 90                                                           | 90                                                                            |
| <i>V</i> /Å <sup>3</sup>                         | 4257.68(5)                                                   | 4184.6(3)                                                                     |
| <i>Z</i>                                         | 4                                                            | 4                                                                             |
| <i>F</i> (000)                                   | 2304.0                                                       | 1936.0                                                                        |
| Reflection collected                             | 8885                                                         | 3450                                                                          |
| Independent reflections                          | 7963                                                         | 4115                                                                          |
| GOF on <i>F</i> <sup>2</sup>                     | 1.103                                                        | 1.051                                                                         |
| Final R indexes [ <i>I</i> ≥4σ( <i>I</i> )]      | 0.0310                                                       | 0.0509                                                                        |
| Final R indexes [all data]                       | 0.0323                                                       | 0.0575                                                                        |
| <i>w</i> R <sub>2</sub>                          | 0.0932                                                       | 0.1318                                                                        |
| Largest diff. peak and hole (e.Å <sup>-3</sup> ) | 0.89/-0.95                                                   | 1.26/-0.77                                                                    |

Table S2. Bond lengths of Eu ions in **1**.

|                 |            |                 |            |                |            |
|-----------------|------------|-----------------|------------|----------------|------------|
| Eu(00)-O(004)   | 2.2627(17) | Eu(00)-O(003)   | 2.3329(16) | Eu(00)-O(00C)  | 2.3680(18) |
| Eu(00)-O(008)#1 | 2.3680(17) | Eu(00)-O(00B)#2 | 2.3798(17) | Eu(00)-O(00G)  | 2.4319(18) |
| Eu(00)-O(006)#1 | 2.4496(18) | Eu(00)-O(003)#1 | 2.7518(18) |                |            |
| Eu(1)-O(00A)    | 2.2636(16) | Eu(1)-O(005)#3  | 2.3442(16) | Eu(1)-O(007)#4 | 2.3600(19) |
| Eu(1)-O(00F)#5  | 2.3774(16) | Eu(1)-O(009)#6  | 2.3873(17) | Eu(1)-O(00D)#3 | 2.4605(18) |
| Eu(1)-O(00E)    | 2.4769(18) | Eu(1)-O(005)#7  | 2.6836(17) |                |            |
| Eu(00)-Eu(00)#3 | 3.9127(2)  | Eu(00)-Eu(1)#8  | 5.0192(2)  | Eu(1)-Eu(1)#3  | 3.8776(2)  |

Symmetry transformations used to generate equivalent atoms:

#1 -*x*, -*y*+1, -*z*+1 #2 *x*-1, *y*, *z* #3 -*x*+1/2, *y*+1/2, -*z*+1/2 #4 *x*, *y*, *z*-1 #5 *x*+1, *y*, *z*  
 #6 -*x*+2, -*y*+1, -*z*+1 #7 *x*+1/2, -*y*+1/2, *z*-1/2 #8 *x*-1, *y*, *z*

Table S3. Bond lengths of Eu ions in **2**.

|                 |           |                 |           |               |           |
|-----------------|-----------|-----------------|-----------|---------------|-----------|
| Eu(01)-O(6)     | 2.310(5)  | Eu(01)-O(2)     | 2.350(5)  | Eu(01)-O(3)   | 2.366(5)  |
| Eu(01)-O(7)#1   | 2.367(5)  | Eu(01)-O(5)#2   | 2.428(5)  | Eu(01)-O(4)#2 | 2.471(5)  |
| Eu(01)-O(8)     | 2.508(7)  | Eu(01)-O(1)     | 2.592 (3) | Eu(01)-O(2)#2 | 2.750 (5) |
| Eu(01)-Eu(01)#2 | 4.0447(7) | Eu(01)-Eu(01)#1 | 4.7181(7) |               |           |

Symmetry transformations used to generate equivalent atoms:

#1  $-x+1, y, -z+1/2$  #2  $-x+1, -y+1, -z+1$

Table S4. Crystal data and Pawley refinement parameters for **1** immersed in water.

| Compound                  | <b>1 immersed in water</b> |
|---------------------------|----------------------------|
| Temperature(K)            | 293                        |
| Space group               | $P2_1/n$                   |
| a/Å                       | 11.08325(7)                |
| b/Å                       | 22.61446(6)                |
| c/Å                       | 16.47657(9)                |
| $\alpha/^\circ$           | 90                         |
| $\beta/^\circ$            | 95.255(01)                 |
| $\gamma/^\circ$           | 90                         |
| V/Å <sup>3</sup>          | 4112.20(5)                 |
| R <sub>wp</sub>           | 0.0378                     |
| R <sub>wp</sub> (w/o bck) | 0.0677                     |
| R <sub>p</sub>            | 0.021                      |

Table S5. The pH values of different concentration of amino acid solution tested by pH meter.

| C (mM) | pH value of Asp solution | pH value of Glu solution |
|--------|--------------------------|--------------------------|
| 0.05   | 4.07                     | 4.50                     |
| 0.1    | 3.91                     | 4.26                     |
| 0.2    | 3.80                     | 4.05                     |
| 0.3    | 3.71                     | 3.96                     |
| 0.4    | 3.67                     | 3.88                     |
| 0.5    | 3.60                     | 3.81                     |
| 0.6    | 3.52                     | 3.79                     |
| 0.8    | 3.48                     | 3.75                     |
| 1.0    | 3.40                     | 3.69                     |
| 10.0   | 3.09                     | 3.35                     |
